# Supplementary material
Source: publisher site journal article supplement (https://www.dovepress.com/article/supplementary_file/602020/602020%20Supplementary%20Tables.docx)
Supplement: Supplementary file 1 [file 602020%20Supplementary%20Tables.docx]

**Table S1.** Multivariable linear regression demonstrating the association of determinants with subdomains of UWES-17 in registered nurses with completed responses across all three subdomains

| **Determinants** | **Vigor** (n = 506) | | **Dedication** (n = 506) | | **Absorption** (n = 506) | |
| --- | --- | --- | --- | --- | --- | --- |
| Beta (95% CI) | p-value | Beta (95% CI) | p-value | Beta (95% CI) | p-value |
| Age (every 1-year increase) | 0.1 (-0.1, 0.2) | 0.46 | 0.2 (0.1, 0.4) | <0.01 | 0.2 (0.0, 0.4) | 0.03 |
| Gender |  |  |  |  |  |  |
| Female | (reference) |  |  |  |  |  |
| Male | -0.4 (-2.5, 1.8) | 0.74 | 0.2 (-1.8, 2.1) | 0.84 | 0.5 (-1.8, 2.8) | 0.68 |
| Child |  |  |  |  |  |  |
| No | (reference) |  |  |  |  |  |
| Yes | -0.7 (-2.9, 1.4) | 0.52 | -0.4 (-2.4, 1.6) | 0.67 | -1.2 (-3.5, 1.2) | 0.34 |
| Education |  |  |  |  |  |  |
| Less than bachelor | (reference) |  |  |  |  |  |
| Bachelor | 0.8 (-3.2, 4.7) | 0.70 | 0.9 (-2.8, 4.5) | 0.63 | -2.7 (-7.1, 1.7) | 0.23 |
| Master or PhD | -0.2 (-2.0, 1.6) | 0.81 | -0.9 (-2.5, 0.8) | 0.30 | -0.8 (-2.8, 1.2) | 0.42 |
| Marriage status |  |  |  |  |  |  |
| Single | (reference) |  |  |  |  |  |
| Married | 0.6 (-1.5, 2.7) | 0.56 | 0.4 (-1.5, 2.3) | 0.69 | 0.2 (-2.1, 2.5) | 0.84 |
| Divorced or widowed | 0.8 (-3.3, 4.9) | 0.69 | 1.2 (-2.6, 5.0) | 0.52 | 1.8 (-2.7, 6.3) | 0.43 |
| Financial situation |  |  |  |  |  |  |
| More than adequate | (reference) |  |  |  |  |  |
| Just adequate | -0.9 (-2.1, 0.3) | 0.13 | -0.5 (-1.6, 0.6) | 0.37 | -0.2 (-1.5, 1.1) | 0.76 |
| Inadequate | -1.3 (-3.9, 1.2) | 0.31 | 0.3 (-2.1, 2.6) | 0.82 | 0.7 (-2.1, 3.5) | 0.64 |
| Physical underlying diseases |  |  |  |  |  |  |
| No | (reference) |  |  |  |  |  |
| Yes | -1.2 (-2.6, 0.1) | 0.07 | 0.7 (0.2, 1.2) | <0.01 | 0.5 (-0.1, 1.1) | 0.11 |
| Psychiatric underlying diseases |  |  |  |  |  |  |
| No | (reference) |  |  |  |  |  |
| Yes | 3.2 (-0.5, 7.0) | 0.09 | -1.1 (-2.3, 0.2) | 0.09 | -1.2 (-2.7, 0.3) | 0.11 |
| Type of employment |  |  |  |  |  |  |
| Bureaucrat | (reference) |  |  | 0.12 | 4.5 (0.4, 8.6) | 0.03 |
| Regular | 0.5 (-1.5, 2.5) | 0.61 | 0.0 (0.0, 0.0) |  |  |  |
| Temporary | -1.6 (-4.3, 1.1) | 0.25 | 0.1 (-1.7, 1.9) | 0.92 | -0.4 (-2.5, 1.8) | 0.73 |
| Patient contact |  |  |  |  |  |  |
| No | (reference) |  |  |  |  |  |
| Yes | -0.4 (-3.7, 3.0) | 0.83 | -1.2 (-3.7, 1.3) | 0.36 | -1.8 (-4.8, 1.2) | 0.24 |
| Experience (every 1-year increase) | 0.1 (-0.1, 0.2) | 0.42 | -0.3 (-3.4, 2.8) | 0.86 | -1.1 (-4.8, 2.6) | 0.56 |
| Sleep (every 1 hour/night increase) | 0.6 (0.0, 1.1) | 0.04 | 0.0 (-0.1, 0.1) | 1.00 | 0.0 (-0.2, 0.2) | 0.99 |
| High-strain job |  |  |  |  |  |  |
| No | (reference) |  |  |  |  |  |
| Yes | -3.8 (-5.2, -2.4) | <0.01 | -4.0 (-5.3, -2.7) | <0.01 | -4.4 (-5.9, -2.9) | <0.01 |
| Physical demand |  |  |  |  |  |  |
| Low | (reference) |  |  |  |  |  |
| High | -0.7 (-2.1, 0.6) | 0.30 | -1.7 (-3.0, -0.5) | <0.01 | -0.7 (-2.2, 0.8) | 0.35 |
| Job security |  |  |  |  |  |  |
| Low | (reference) |  |  |  |  |  |
| High | 1.0 (-0.2, 2.3) | 0.10 | 0.5 (-0.6, 1.7) | 0.36 | 0.1 (-1.3, 1.5) | 0.86 |
| Level of support |  |  |  |  |  |  |
| Low | (reference) |  |  |  |  |  |
| High | 2.0 (0.6, 3.4) | <0.01 | 1.2 (-0.1, 2.5) | 0.06 | 1.7 (0.2, 3.3) | 0.03 |
| Job hazard |  |  |  |  |  |  |
| Low | (reference) |  |  |  |  |  |
| High | -1.2 (-2.5, 0.0) | 0.05 | -1.2 (-2.4, -0.1) | 0.03 | -1.4 (-2.8, -0.1) | 0.04 |

CI, confidence interval; n, frequency; PhD, Doctor of Philosophy; UWES-17, 17-item Utrecht Work Engagement Scale

**Table S2.** Multivariable linear regression demonstrating the association of determinants with subdomains of UWES-17 in practical nurses and nursing assistants with completed responses across all three subdomains

| **Determinants** | **Vigor** (n = 188) | | **Dedication** (n = 188) | | **Absorption** (n = 188) | |
| --- | --- | --- | --- | --- | --- | --- |
| Beta (95% CI) | p-value | Beta (95% CI) | p-value | Beta (95% CI) | p-value |
| Age (every 1-year increase) | -0.1 (-0.3, 0.2) | 0.65 | 0.1 (-0.1, 0.4) | 0.20 | 0.2 (-0.1, 0.4) | 0.24 |
| Gender |  |  |  |  |  |  |
| Female |  |  |  |  |  |  |
| Male | -1.0 (-4.1, 2.2) | 0.55 | 0.1 (-3.0, 3.3) | 0.94 | 0.7 (-2.9, 4.4) | 0.69 |
| Child |  |  |  |  |  |  |
| No |  |  |  |  |  |  |
| Yes | -1.4 (-4.1, 1.2) | 0.30 | -0.8 (-3.5, 1.8) | 0.54 | -2.6 (-5.6, 0.5) | 0.10 |
| Education |  |  |  |  |  |  |
| Less than bachelor |  |  |  |  |  |  |
| Bachelor | 0.2 (-13.3, 13.8) | 0.97 | 8.4 (-5.1, 21.9) | 0.22 | 10.7 (-5.1, 26.4) | 0.18 |
| Master or PhD | 0.6 (-13.0, 14.3) | 0.93 | 8.2 (-5.4, 21.8) | 0.23 | 10.3 (-5.5, 26.2) | 0.20 |
| Marriage status |  |  |  |  |  |  |
| Single |  |  |  |  |  |  |
| Married | 1.8 (-1.1, 4.7) | 0.22 | 2.3 (-0.6, 5.2) | 0.11 | 2.6 (-0.8, 6.0) | 0.13 |
| Divorced or widowed | 3.8 (-0.7, 8.3) | 0.09 | 3.9 (-0.5, 8.4) | 0.08 | 3.7 (-1.5, 8.8) | 0.17 |
| Financial situation |  |  |  |  |  |  |
| More than adequate |  |  |  |  |  |  |
| Just adequate | 0.6 (-1.7, 3.0) | 0.59 | 0.1 (-2.3, 2.4) | 0.96 | -1.0 (-3.8, 1.7) | 0.47 |
| Inadequate | -1.3 (-4.3, 1.6) | 0.37 | -3.0 (-6.0, -0.1) | 0.04 | -2.6 (-6.1, 0.8) | 0.13 |
| Physical underlying diseases |  |  |  |  |  |  |
| No |  |  |  |  |  |  |
| Yes | 0.6 (-0.3, 1.5) | 0.22 | 0.0 (-0.9, 1.0) | 0.92 | 0.0 (-1.1, 1.0) | 0.97 |
| Psychiatric underlying diseases |  |  |  |  |  |  |
| No |  |  |  |  |  |  |
| Yes | -0.6 (-2.9, 1.8) | 0.64 | -1.9 (-4.2, 0.5) | 0.12 | -1.5 (-4.2, 1.2) | 0.27 |
| Type of employment |  |  |  |  |  |  |
| Bureaucrat | -1.8 (-7.4, 3.8) | 0.53 | 0.2 (-5.4, 5.7) | 0.96 | -0.2 (-6.7, 6.3) | 0.95 |
| Regular |  |  |  |  |  |  |
| Temporary | -0.7 (-6.8, 5.4) | 0.81 | 0.0 (-6.1, 6.0) | 0.99 | -1.8 (-8.9, 5.3) | 0.61 |
| Patient contact |  |  |  |  |  |  |
| No |  |  |  |  |  |  |
| Yes | 1.8 (-5.1, 8.7) | 0.61 | 0.3 (-6.5, 7.2) | 0.92 | -0.8 (-8.8, 7.2) | 0.84 |
| Experience (every 1-year increase) | 1.2 (-3.4, 5.7) | 0.61 | 2.8 (-1.7, 7.4) | 0.21 | 1.4 (-3.9, 6.6) | 0.61 |
| Sleep (every 1 hour/night increase) | 0.3 (0.0, 0.5) | 0.04 | 0.0 (-0.2, 0.3) | 0.89 | 0.0 (-0.3, 0.3) | 0.84 |
| High-strain job |  |  |  |  |  |  |
| No |  |  |  |  |  |  |
| Yes | -5.5 (-8.3, -2.8) | <0.01 | -5.3 (-8.0, -2.5) | <0.01 | -5.9 (-9.1, -2.7) | <0.01 |
| Physical demand |  |  |  |  |  |  |
| Low |  |  |  |  |  |  |
| High | 0.0 (-2.2, 2.1) | 0.98 | 0.6 (-1.5, 2.8) | 0.57 | 1.8 (-0.7, 4.3) | 0.17 |
| Job security |  |  |  |  |  |  |
| Low |  |  |  |  |  |  |
| High | -0.1 (-2.3, 2.0) | 0.91 | 1.6 (-0.5, 3.8) | 0.14 | -0.6 (-3.1, 1.9) | 0.66 |
| Level of support |  |  |  |  |  |  |
| Low |  |  |  |  |  |  |
| High | 3.5 (0.9, 6.1) | <0.01 | 3.7 (1.1, 6.3) | <0.01 | 1.9 (-1.1, 4.9) | 0.21 |
| Job hazard |  |  |  |  |  |  |
| Low |  |  |  |  |  |  |
| High | 0.2 (-2.1, 2.5) | 0.86 | -1.4 (-3.6, 0.9) | 0.23 | -2.7 (-5.4, -0.1) | 0.04 |

CI, confidence interval; n, frequency; PhD, Doctor of Philosophy; UWES-17, 17-item Utrecht Work Engagement Scale
